# Supplementary material for: High-affinity autoreactive plasma cells disseminate through multiple organs in patients with immune thrombocytopenic purpura
Source: PubMed Central journal article supplement (PMC9197514; doi:10.1172/jci153580), 2022-06-15
Supplement: jci-132-153580-s172.pdf [file jci-132-153580-s172.pdf]

## **Supplementary Materials**

Supplementary Figures S1 – S8

Supplementary Tables S1 – S3

Figure S1

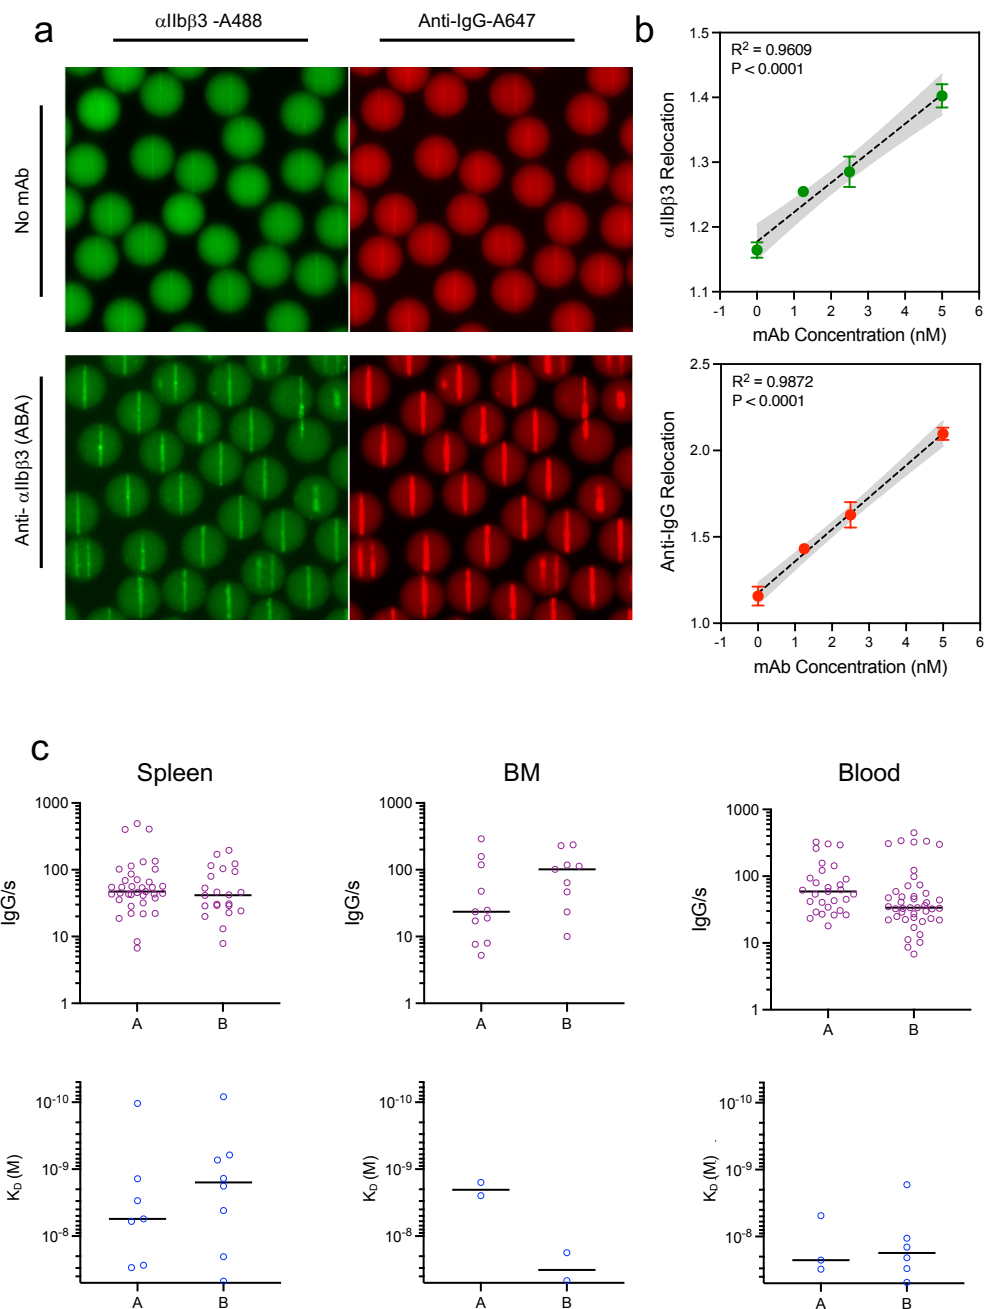

**Figure S1. Bioassay calibration and reproducibility.** (a) Representative images of droplet arrays containing a monoclonal antibody specific for  $\alpha$ IIB $\beta$ 3. (b) Quantification of fluorescent relocation in response to antibody concentration for  $\alpha$ IIB $\beta$ 3-Alexa488 (green) and anti-IgG F(ab')<sub>2</sub>-Alexa647 (red). Fluorescent relocation is obtained by dividing the fluorescent signal from the beadline by the average fluorescent background signal of the drop. Relocation values for a range of monoclonal antibody concentrations were plotted and linear regression was performed. R-squared and P values are indicated. (c) Replicates for single-cell measurements. Data for IgG-secretion (top) and affinity for  $\alpha$ IIB $\beta$ 3 (bottom) is shown for two replicates (A and B). All samples described in this work were analyzed in duplicate or triplicate.

Figure S2

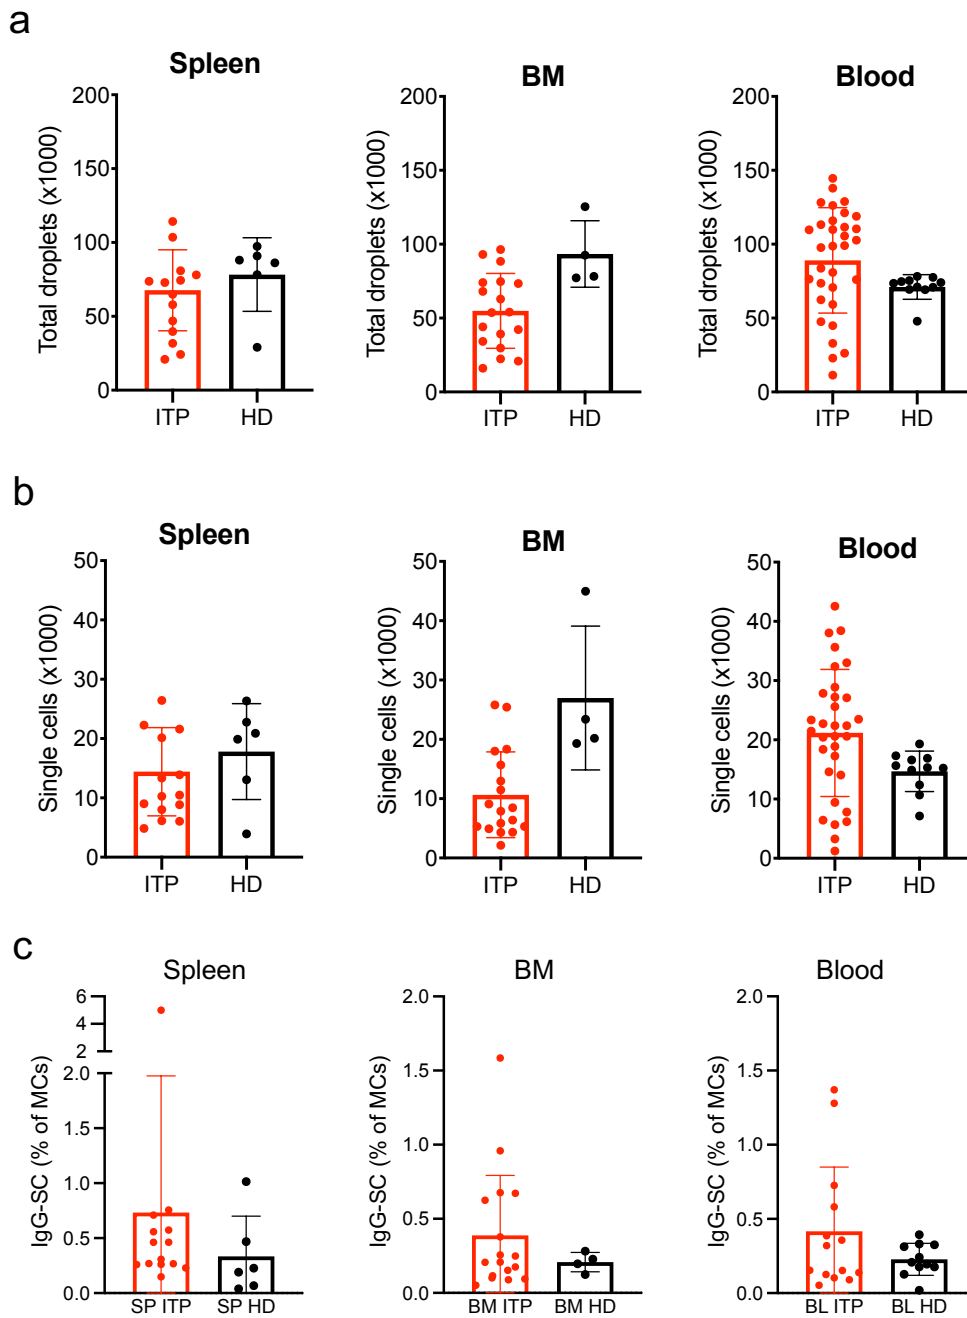

**Figure S2. DropMap system throughput and IgG production by single cells.** (a) Total number of droplets analyzed, (b) total number of single cells included in the analysis, and (c) number of IgG-SC found in each sample are represented for every sample described in this work. Every data point corresponds to a single sample after pooling of 2-3 replicate acquisitions. Data is shown as mean and SD.

Figure S3

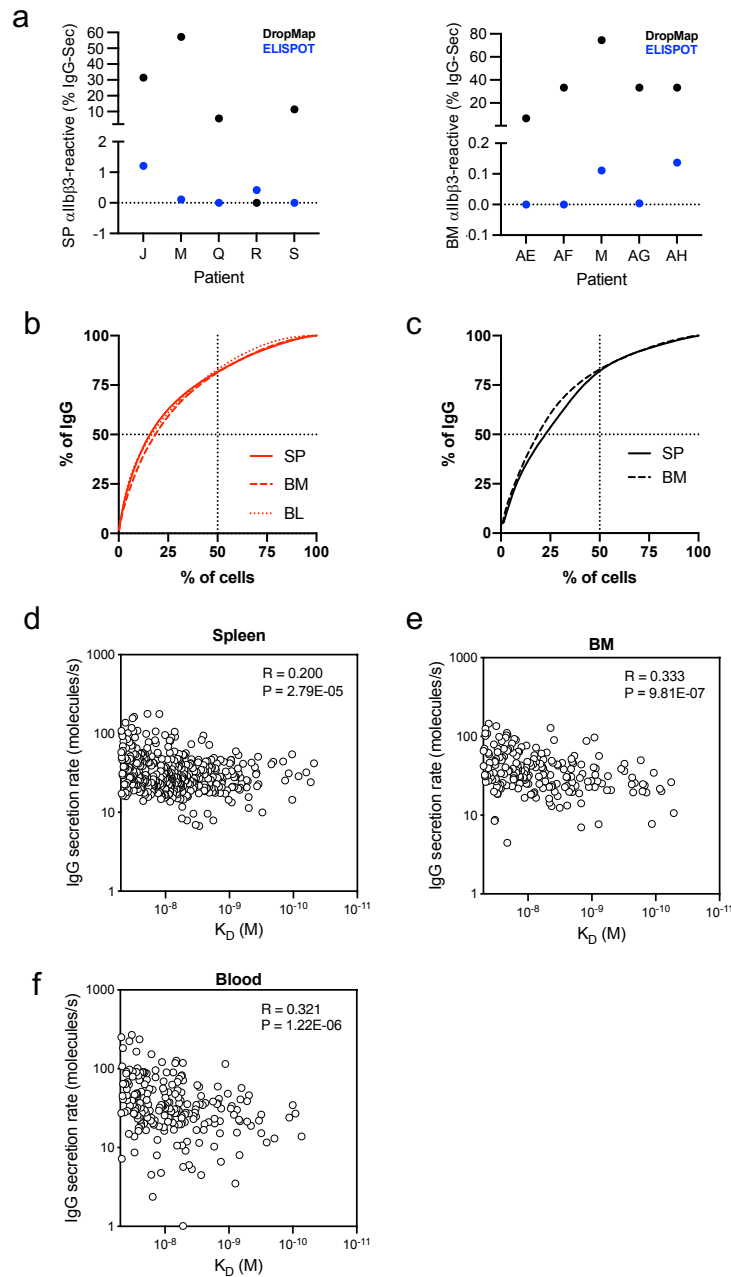

**Figure S3. Sensitivity of the bioassay, cumulative IgG secretion and absence of correlation between IgG secretion and affinity for  $\alpha\text{IIb}\beta\text{3}$ .** (a) Comparison of percentage of  $\alpha\text{IIb}\beta\text{3}$ -reactive cells among IgG-SC identified by DropMap (black dots) or by ELISPOT (blue dots) in spleen (SP; left) and bone marrow (BM; right). (b-c) Percentage of the total mass of secreted IgG relative to the percentage of IgG-SC ordered from highest to lowest IgG producer. Data for all the IgG-SC from all (b) patients with ITP and (c) healthy donors is pooled by organ. (d-f) Absence of correlation between IgG secretion rate and  $K_D$  for  $\alpha\text{IIb}\beta\text{3}$ . Pooled data from all anti- $\alpha\text{IIb}\beta\text{3}$  IgG-SC identified from all (d) spleen, (e) bone marrow and (f) blood from all patients with ITP is shown. Correlation analysis performed using Pearson's coefficient, R values are indicated.

Figure S4

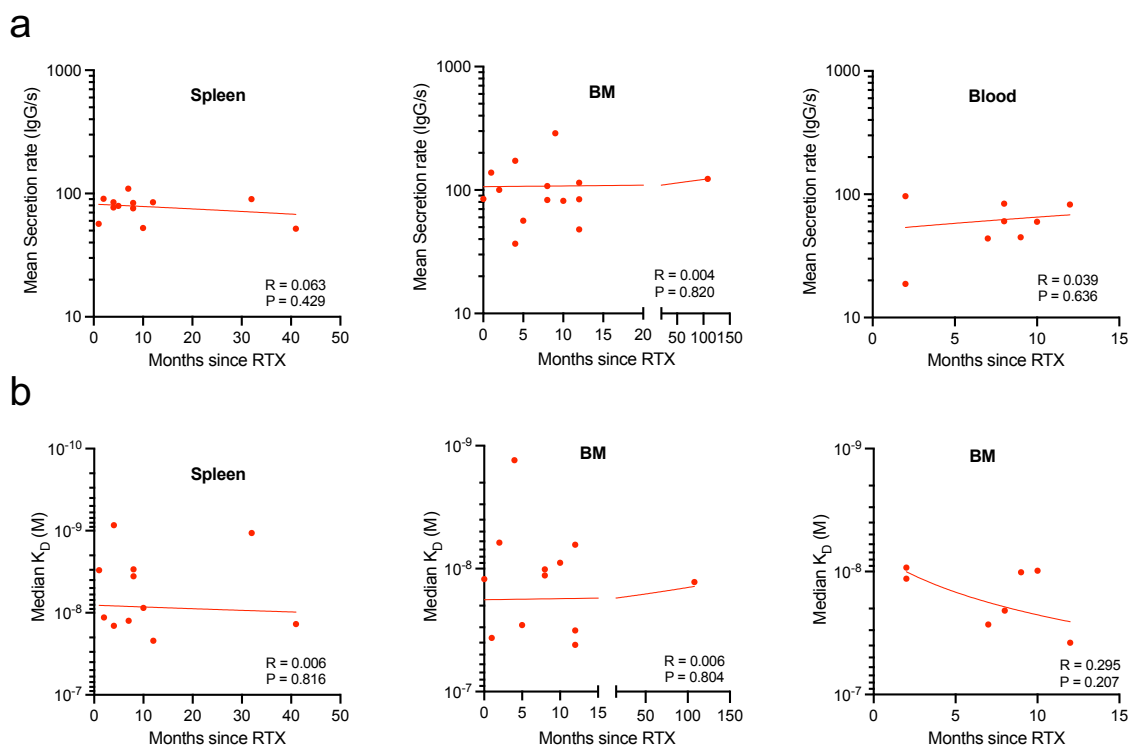

**Figure S4. Absence of correlation between last rituximab infusion and secretion rate or anti- $\alpha$ I**Ib** $\beta$ 3 affinity.** Scatterplots compare the mean secretion rate (a) or the Median  $K_D$  (b) with the time since the last Rituximab infusion. Cells were obtained from spleen (left), bone marrow (center) and blood (right) of ITP patients. Pearson analysis was performed, R and P values are indicated.

Figure S5

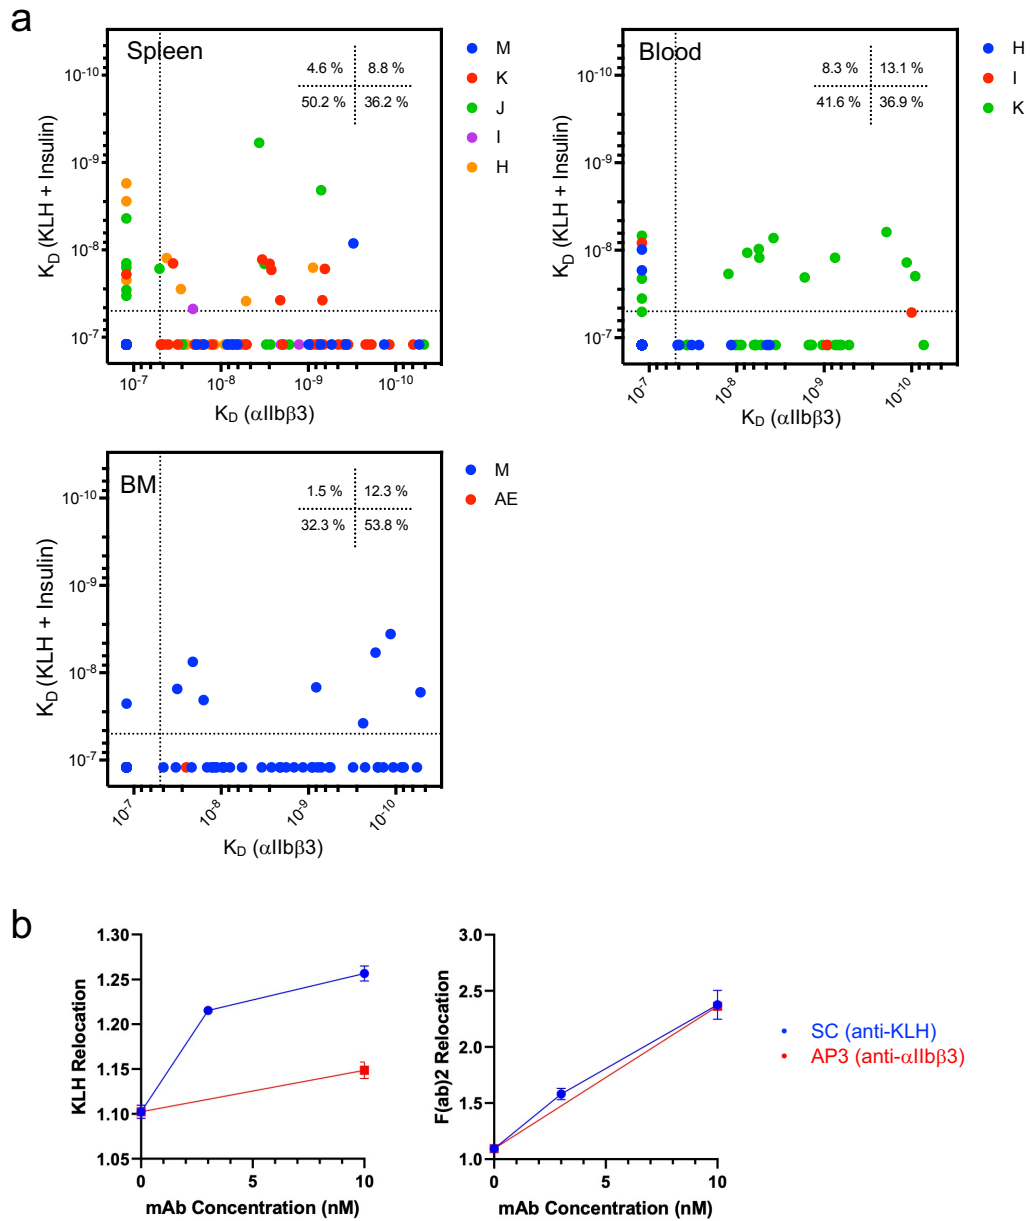

**Figure S5. Polyreactivity measurements.** (a) Affinity values of single IgG-SC against  $\alpha$ IIb $\beta$ 3 and (KLH+insulin) from a multiplexed bioassay containing fluorescently labeled  $\alpha$ IIb $\beta$ 3-Alexa488, KLH-Alexa405 and Insulin-Alexa405. KLH and human insulin are labeled with the same fluorochrome to obtain a single affinity measurement [ $K_D$  (KLH+insulin)] for both these irrelevant antigens as a measure of polyreactivity. Distribution per quadrant is indicated with color codes per patient. (b) Positive and negative control for KLH binding using an anti-KLH IgG mAb (clone SC) and an anti- $\alpha$ IIb $\beta$ 3 IgG mAb (clone AP3) using the polyreactivity bioassay described in (b). Relocation of KLH (left) and anti-IgG are shown at different concentrations of the mAbs.

Figure S6

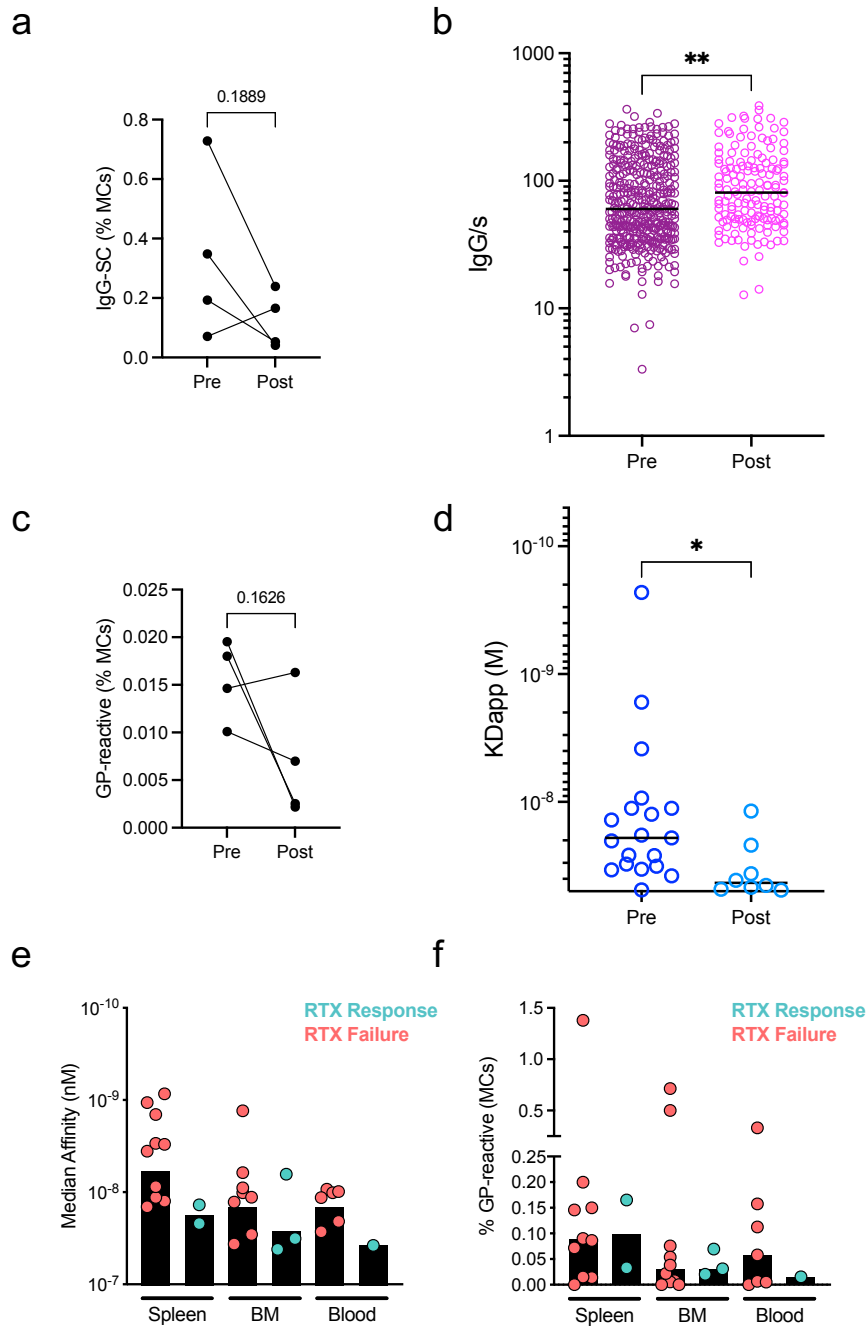

**Figure S6. Effects of Rituximab therapy on the anti- $\alpha$ IIb $\beta$ 3 ASC population.** (a-d) Kinetic follow-up of four RTX-responding patients before (pre) and after (post) rituximab therapy for (a) frequency of IgG-SC among PBMCs, (b) IgG secretion rate, (c) frequency of  $\alpha$ IIb $\beta$ 3-reactive IgG-SC among PBMCs, (d) affinity for  $\alpha$ IIb $\beta$ 3 of single IgG-SC. Single-cell secretion rates and affinity values, and medians, are plotted in (b) and (d), respectively. (e,f) Patients from the main cohort (all patients except the four RTX-responding patients) were grouped according to Rituximab responsiveness: (e) Median affinity and (f) median frequency of autoreactive cells at the time of sampling. \* $P < 0.05$ ; \*\* $P < 0.01$ .

Figure S7

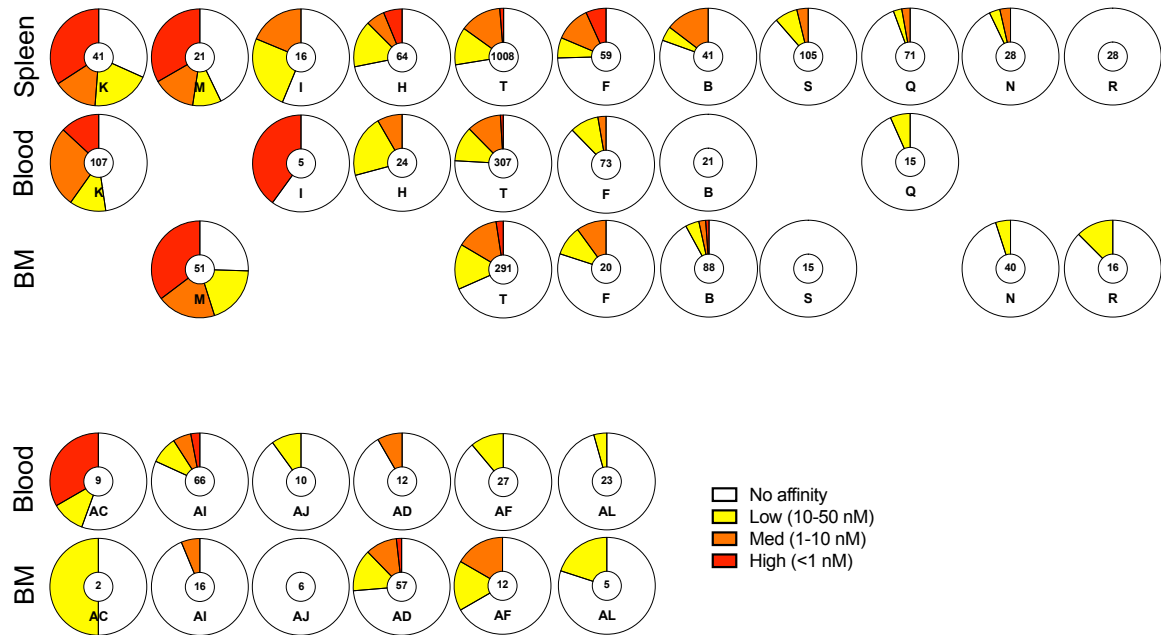

**Figure S7. Affinity distribution among paired organs.** Distribution of IgG-SC into low (yellow), medium (orange) and high (red) affinity binders to  $\alpha$ IIB $\beta$ 3 or non-binders (white), with total IgG-SC numbers indicated, for all patients with ITP with paired samples in this study. Samples are represented ordered by the proportion of  $\alpha$ IIB $\beta$ 3-reactive cells present in the spleen (top) or blood (bottom).



Figure S8

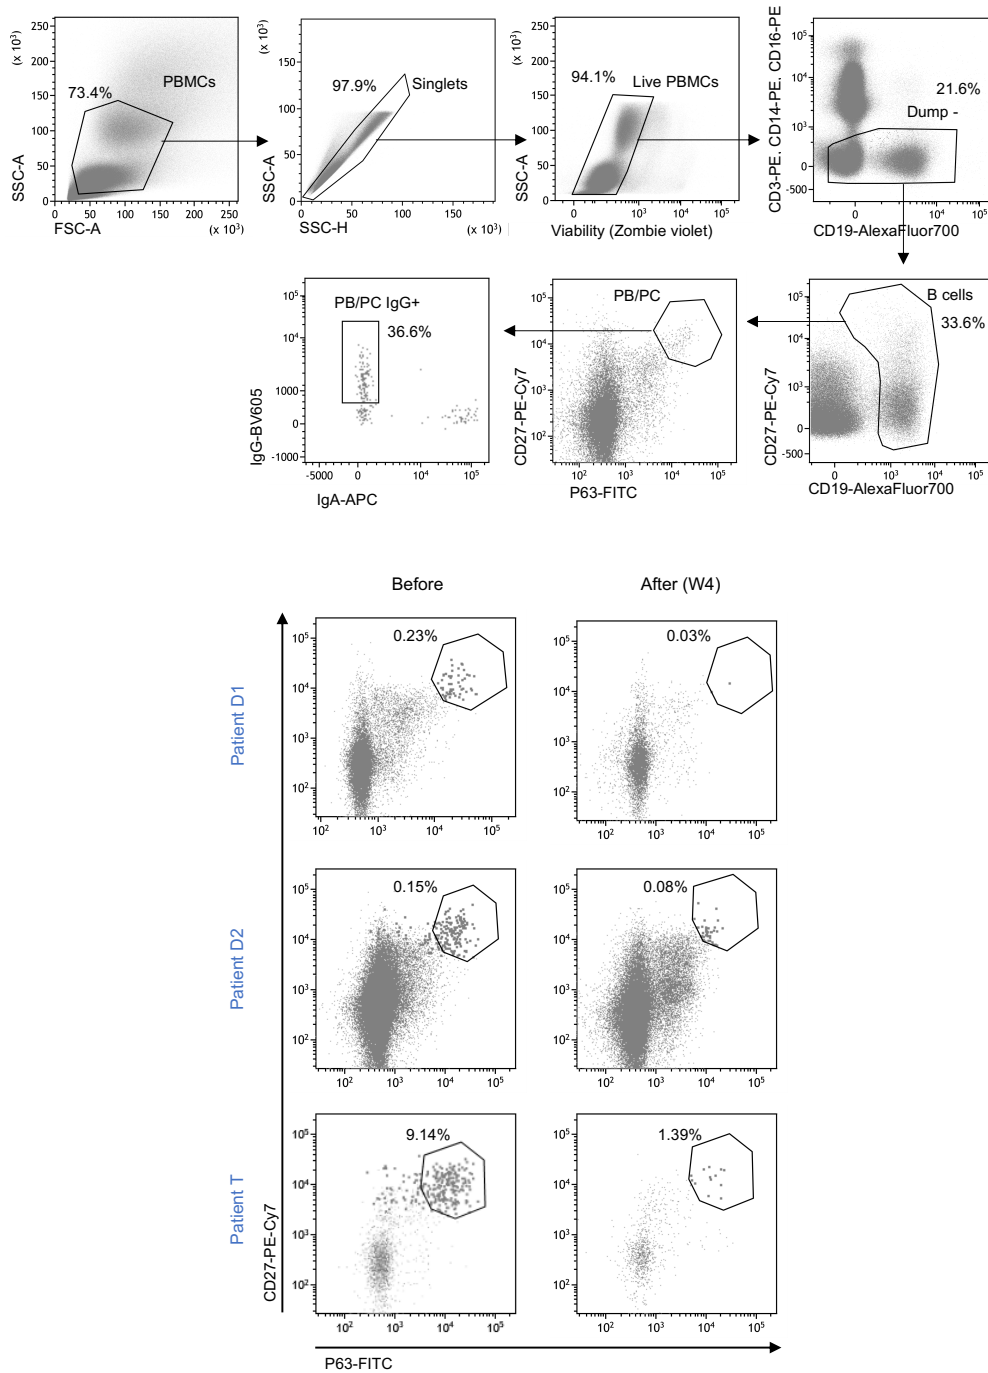

**Figure S8. Identification of circulating plasma cells following daratumumab therapy.** (Top) Gating strategy is shown for IgG<sup>+</sup> plasma cell for a representative PBMC sample after Ficoll gradient and B cell enrichment by negative selection of CD3<sup>+</sup> cells. Plasma cells are identified as live CD3<sup>-</sup>CD14<sup>-</sup>CD16<sup>-</sup>CD19<sup>+/-</sup>CD27<sup>+</sup>p63<sup>+</sup> cells and IgG<sup>+</sup> cells. Percentages of cells within each gate are indicated. All antibodies used for this strategy are included in Supplementary Table 1. (Bottom) Follow-up of circulating IgG<sup>+</sup> plasma cells (within the gate) before daratumumab therapy and at week 4 after the first infusion of daratumumab in patients D1, D2 (same data and dot plots as in Fig.4a) and T. Percentages of cells within each gate are indicated.

**Table S1. Reagents and software used for flow cytometry.**

| Reagent                                                       | Source          | Identifier              | Fluorochrome |
|---------------------------------------------------------------|-----------------|-------------------------|--------------|
| <b>Antibody for surface staining</b>                          |                 |                         |              |
| CD3                                                           | BD Bioscience   | UCHT1 ; 555333          | PE           |
| CD14                                                          | BD Bioscience   | M5E2 ; 564054           | PE           |
| CD16                                                          | BD Bioscience   | 3G8 ; 560995            | PE           |
| CD38                                                          | BD Bioscience   | HIT2 ; 551400           | PerCP Cy5.5  |
| CD27                                                          | BD Bioscience   | M-T271 ; 560609         | PE-Cy7       |
| CD19                                                          | BD Bioscience   | HIB19 ; 557921          | AF700        |
| IgD                                                           | BD Bioscience   | IA6-2 ; 562540          | PE-CF594     |
| <b>Antibody for intracellular staining</b>                    |                 |                         |              |
| VS38c                                                         | Dako            | VS38c ; F7149           | FITC         |
| IgG                                                           | BD Bioscience   | G18-145 ; 563246        | BV605        |
| IgA                                                           | Miltinyi Biotec | IS11-8E10 ; 130-113-472 | APC          |
| IgM                                                           | BD Bioscience   | G20-127 ; 563113        | BV510        |
| <b>Chemical</b>                                               |                 |                         |              |
| eBioscience™ Foxp3 / Transcription Factor Staining Buffer Set | ThermoFisher    | 00-5523-00              |              |
| Zombie Violet™ Fixable Viability Kit                          | Biolegend       | 423114                  |              |
| Softwares                                                     |                 |                         |              |
| Kaluza v2.1                                                   | Beckman Coulter |                         |              |
| GraphPad Prism v8                                             | GraphPad        |                         |              |

**Table S2. Statistical analyses<sup>a</sup>.**

| Figure | Comparison                        | Alternative hypothesis          | Sample size                     | Transformation         | Test                          | p-value  | Adjusted p-value |
|--------|-----------------------------------|---------------------------------|---------------------------------|------------------------|-------------------------------|----------|------------------|
| 1C     | SP and BM                         | mean difference                 | n = 59, n = 20                  | log                    | Welch test                    | 0.76     | 0.97             |
|        | SP and BL                         | mean difference                 | n = 59, n = 73                  | log                    | Welch test                    | 0.64     | 0.97             |
|        | BM and BL                         | mean difference                 | n = 20, n = 73                  | log                    | Welch test                    | 0.97     | 0.97             |
| 1D     | SP and BM                         | mean difference                 | n = 15, n = 4                   | log                    | Welch test                    | 0.33     | 0.50             |
|        | SP and BL                         | mean difference                 | n = 15, n = 9                   | log                    | Welch test                    | 0.01     | 0.04             |
|        | BM and BL                         | mean difference                 | n = 4, n = 9                    | log                    | Welch test                    | 0.50     | 0.50             |
| 2A     | ITP and HD in SP                  | effect difference               | n = 1592, n = 399   df = 44.9   | log                    | Contrast test in linear model | 6e-6     | 1e-5             |
|        | ITP and HD in BM                  | effect difference               | n = 706, n = 206   df = 38.8    | log                    | Contrast test in linear model | 0.63     | 0.70             |
|        | ITP and HD in BL                  | effect difference               | n = 712, n = 376   df = 43.7    | log                    | Contrast test in linear model | 1e-7     | 4e-7             |
|        | SP and BM in ITP                  | effect difference               | n = 1592, n = 706   df = 3787.7 | log                    | Contrast test in linear model | 5e-17    | 4e-16            |
|        | SP and BL in ITP                  | effect difference               | n = 1592, n = 712   df = 3882.1 | log                    | Contrast test in linear model | 0.27     | 0.34             |
|        | BM and BL in ITP                  | effect difference               | n = 706, n = 712   df = 3785.0  | log                    | Contrast test in linear model | 6e-16    | 3e-15            |
|        | SP and BM in HD                   | effect difference               | n = 399, n = 206   df = 40.2    | log                    | Contrast test in linear model | 0.06     | 0.10             |
|        | SP and BL in HD                   | effect difference               | n = 399, n = 376   df = 43.3    | log                    | Contrast test in linear model | 0.79     | 0.79             |
| 2B     | BM and BL in HD                   | effect difference               | n = 206, n = 376   df = 38.1    | log                    | Contrast test in linear model | 0.07     | 0.10             |
|        | ITP and HD in SP                  | effect difference               | n = 1592, n = 399   df = 40.4   | log                    | Contrast test in linear model | 0.005    | 0.005            |
|        | ITP and HD in BM                  | effect difference               | n = 706, n = 206   df = 34.2    | log                    | Contrast test in linear model | 0.005    | 0.005            |
| 2C     | ITP and HD in BL                  | effect difference               | n = 712, n = 376   df = 38.6    | log                    | Contrast test in linear model | 0.005    | 0.005            |
|        | ITP and HD in SP                  | effect difference               | n = 1592, n = 399   df = Inf    | log                    | Contrast test in linear model | 0.006    | 0.006            |
|        | ITP and HD in BM                  | effect difference               | n = 706, n = 206   df = Inf     | log                    | Contrast test in linear model | 0.006    | 0.006            |
| 3A     | ITP and HD in BL                  | effect difference               | n = 712, n = 376   df = Inf     | log                    | Contrast test in linear model | 0.006    | 0.006            |
|        | SP and BM                         | mean difference                 | n = 14, n = 17                  | none (0 values)        | Welch test                    | 0.4694   | 0.7041           |
|        | SP and BL                         | mean difference                 | n = 14, n = 14                  | none (0 values)        | Welch test                    | 0.2987   | 0.7041           |
| 3D-F   | BM and BL                         | mean difference                 | n = 17, n = 14                  | none (0 values)        | Welch test                    | 0.7416   | 0.7416           |
|        | SP and BL                         | Correlation different from zero | n = 6                           | log (0 values removed) | Pearson correlation test      | 0.007    | 0.02             |
|        | SP and BM                         | Correlation different from zero | n = 5                           | log (0 values removed) | Pearson correlation test      | 0.02     | 0.03             |
| S1-B   | BM and BL                         | Correlation different from zero | n = 7                           | log (0 values removed) | Pearson correlation test      | 0.58     | 0.58             |
|        | mAb and Relocation (GPIIb/IIIa)   | Slope different from zero       | n = 4                           | none                   | Simple linear regression      | 0.000019 | -                |
|        | mAb and Relocation (IgG)          | Slope different from zero       | n = 4                           | none                   | Simple linear regression      | 6.6E-07  | -                |
| S3-D-F | Kd and IgG-Sec (SP)               | Correlation different from zero | n = 431                         | none                   | Pearson correlation test      | 2.79E-05 | 2.79E-05         |
|        | Kd and IgG-Sec (BM)               | Correlation different from zero | n = 206                         | none                   | Pearson correlation test      | 9.81E-07 | 9.81E-07         |
|        | Kd and IgG-Sec (BL)               | Correlation different from zero | n = 219                         | none                   | Pearson correlation test      | 1.22E-06 | 1.22E-06         |
| S4-A   | Months since RTX and IgG-Sec (SP) | Correlation different from zero | n = 11                          | none                   | Pearson correlation test      | 0.429    | -                |
|        | Months since RTX and IgG-Sec (BM) | Correlation different from zero | n = 12                          | none                   | Pearson correlation test      | 0.82     | -                |
|        | Months since RTX and IgG-Sec (BL) | Correlation different from zero | n = 7                           | none                   | Pearson correlation test      | 0.636    | -                |
| S4-B   | Months since RTX and Kd (SP)      | Correlation different from zero | n = 11                          | none                   | Pearson correlation test      | 0.816    | -                |
|        | Months since RTX and Kd (BM)      | Correlation different from zero | n = 12                          | none                   | Pearson correlation test      | 0.804    | -                |

|      | Months since<br>RTX and Kd (BL)        | Correlation<br>different from zero | n = 7   | none | Pearson correlation<br>test | 0.207  | - |
|------|----------------------------------------|------------------------------------|---------|------|-----------------------------|--------|---|
| S6-A | Pre and Post<br>(Mean IgG-Sec)         | mean difference                    | n = 8   | none | Paired T test               | 0.1889 | - |
| S6-B | Pre and Post<br>(IgG-Sec)              | mean difference                    | n = 550 | none | Welch test                  | 0.009  | - |
| S6-C | Pre and Post<br>(Mean GP-<br>Reactive) | mean difference                    | n = 8   | none | Paired T test               | 0.1626 | - |
| S6-D | Pre and Post (Kd)                      | mean difference                    | n = 27  | none | Welch test                  | 0.011  | - |

<sup>a</sup> n: sample size for each class tested, respectively; df: degree of freedom. Adjusted p values from the same panel according to Benjamini & Hochberg

**Table S3. Antibodies used for assay calibration**

| Clone/Identifier | Affinity for $\alpha$ IIb $\beta$ 3 (K <sub>D</sub> - M) | Source                                                               | Description                                                                                                                                   |
|------------------|----------------------------------------------------------|----------------------------------------------------------------------|-----------------------------------------------------------------------------------------------------------------------------------------------|
| <b>7E3</b>       | 2.6E-10                                                  | Absolute antibody                                                    | Human Anti-CD41 [Clone 7E3 (Abciximab)]                                                                                                       |
| <b>H3</b>        | 6.0E-08                                                  | Institut Necker Enfants Malades, Paris, France (Dr Matthieu Mahévas) | Cloned and expressed in house as a fully human IgG1                                                                                           |
| <b>VI-PL2</b>    | 1.1E-09                                                  | Sony Europe BV                                                       | Purified anti-human CD61 (Clone VI-PL2)                                                                                                       |
| <b>PL2-49</b>    | 1.4E-09                                                  | BioCytex, France (Dr Maxime Moulard)                                 | anti-CD41                                                                                                                                     |
| <b>AP3</b>       | 1.8E-09                                                  | Institut Pasteur, Paris, France (Dr Pierre Bruhns)                   | Cloned and expressed in house as a human IgG1 from the published sequence; <i>Newman PJ, Allen RW, Kahn RA &amp; Kunicki TJ. Blood (1985)</i> |
| <b>HIP2</b>      | 8.0E-10                                                  | BD Biosciences                                                       | CD41b Hu - clone HIP2                                                                                                                         |
| <b>PM3G5</b>     | 1.5E-09                                                  | BioCytex, France (Dr Maxime Moulard)                                 | anti-CD61 – clone PM3G5                                                                                                                       |
| <b>LYP18</b>     | 7.4E-10                                                  | Faculté de Médecine René Laënnec, Lyon, France (Dr Habib Boukerche)  | mAb purified from clone LYP18 (P18)                                                                                                           |
| <b>A2A9/6</b>    | 4.6E-09                                                  | Sony Europe BV                                                       | Purified anti-human CD41/CD61                                                                                                                 |
| <b>PM6/13</b>    | 1.0E-09                                                  | Southern Biotech                                                     | Mouse anti-human CD61-UNLB                                                                                                                    |
